# Supplementary material for: Rethinking the “Diseases of Affluence” Paradigm: Global Patterns of Nutritional Risks in Relation to Economic Development
Source: PLOS journal article supplement (doi:10.1371/journal.pmed.0020133), 2005-04-28
Supplement: S1 (10.1371/journal.pmed.0020133.s001) [file journal.pmed.0020133.s001]

## Supplementary Online Material

**Table S1:** Countries used in the analysis and data availability for systolic blood pressure (SBP), cholesterol, body mass index (BMI), and food share of household expenditure. Data on national income and proportion of population in urban areas were available for all countries.

| Country <sup>1,2</sup>           | Code | 2000 income (Int\$) <sup>3</sup> | SBP <sup>4,5</sup> | Cholesterol <sup>4,5</sup> | BMI <sup>4,5</sup> | Food share of expenditure |
|----------------------------------|------|----------------------------------|--------------------|----------------------------|--------------------|---------------------------|
| <i>African region</i>            |      |                                  |                    |                            |                    |                           |
| Burundi                          | BDI  | 523                              |                    |                            |                    | ✓                         |
| Cameroon                         | CMR  | 2,042                            | ✓                  |                            | ✓                  |                           |
| Democratic Republic of the Congo | ZAR  | 315                              | ✓                  |                            |                    |                           |
| Ethiopia                         | ETH  | 635                              | ✓                  |                            | ✓                  |                           |
| Gambia                           | GMB  | 1,217                            | ✓                  | ✓                          | ✓                  |                           |
| Ghana                            | GHA  | 1,351                            | ✓                  | ✓                          | ✓ (F)              | ✓                         |
| Kenya                            | KEN  | 1,244                            | ✓                  |                            | ✓ (F)              |                           |
| Lesotho                          | LSO  | 1,592                            | ✓                  |                            |                    |                           |
| Liberia                          | LBR  | 2477                             | ✓                  |                            |                    |                           |
| Malawi                           | MWI  | 784                              | ✓                  |                            | ✓                  |                           |
| Mali                             | MLI  | 969                              |                    |                            | ✓                  |                           |
| Mauritius                        | MUS  | 13,932                           | ✓                  |                            |                    | ✓                         |
| Namibia                          | NAM  | 4,381                            |                    |                            |                    | ✓                         |
| Nigeria                          | NGA  | 707                              | ✓                  | ✓                          | ✓                  |                           |
| Senegal                          | SEN  | 1,622                            | ✓                  |                            | ✓                  | ✓                         |
| Seychelles                       | SYC  | 10,241                           | ✓                  | ✓                          | ✓                  |                           |
| Sierra Leone                     | SLE  | 534                              | ✓                  |                            |                    |                           |
| South Africa                     | ZAF  | 7,541                            | ✓                  | ✓                          | ✓                  | ✓                         |
| United Republic of Tanzania      | TZA  | 482                              | ✓                  | ✓                          | ✓ (F)              | ✓                         |
| Zambia                           | ZMB  | 892                              |                    |                            |                    | ✓                         |
| Zimbabwe                         | ZWE  | 2,486                            | ✓                  | ✓                          | ✓                  |                           |
| <i>Region of the Americas</i>    |      |                                  |                    |                            |                    |                           |
| Argentina                        | ARG  | 11,006                           | ✓                  |                            | ✓                  | ✓                         |
| Bahamas                          | BHS  | 13,134                           | ✓                  |                            |                    |                           |
| Barbados                         | BRB  | 16,415                           | ✓                  |                            | ✓                  |                           |
| Belize                           | BLZ  | 6,591                            | ✓                  |                            |                    |                           |
| Brazil                           | BRA  | 7,190                            | ✓                  | ✓ (M)                      | ✓                  | ✓                         |
| Canada                           | CAN  | 26,904                           | ✓                  | ✓                          | ✓                  | ✓                         |
| Chile                            | CHL  | 9,926                            | ✓                  | ✓                          |                    |                           |
| Colombia                         | COL  | 5,383                            | ✓                  | ✓ (M)                      |                    | ✓                         |
| Costa Rica                       | CRI  | 5,870                            |                    |                            |                    | ✓                         |
| Cuba                             | CUB  | 2,499                            |                    | ✓                          | ✓                  |                           |
| Dominican Republic               | DOM  | 5,270                            | ✓                  | ✓                          |                    |                           |
| Ecuador                          | ECU  | 3,468                            | ✓                  |                            |                    |                           |
| Guatemala                        | GTM  | 3,914                            |                    |                            | ✓ (F)              |                           |
| Guyana                           | GUY  | 3,520                            |                    |                            |                    | ✓                         |
| Haiti                            | HTI  | 1,021                            | ✓                  |                            |                    |                           |
| Jamaica                          | JAM  | 3,693                            | ✓                  | ✓                          |                    | ✓                         |
| Mexico                           | MEX  | 8,762                            | ✓                  | ✓                          | ✓                  | ✓                         |

|                                     |     |        |   |       |       |   |
|-------------------------------------|-----|--------|---|-------|-------|---|
| Nicaragua                           | NIC | 1,767  |   |       |       | ✓ |
| Panama                              | PAN | 6,066  |   |       |       | ✓ |
| Paraguay                            | PRY | 4,684  | ✓ |       | ✓     | ✓ |
| Peru                                | PER | 4,589  |   |       | ✓ (F) | ✓ |
| Saint Lucia                         | LCA | 6,330  | ✓ |       | ✓     |   |
| Trinidad and Tobago                 | TTO | 11,175 | ✓ |       |       |   |
| United States of America            | USA | 33,293 | ✓ | ✓     | ✓     | ✓ |
| Uruguay                             | URY | 9,622  | ✓ | ✓     |       |   |
| Venezuela (Bolivarian Republic of)  | VEN | 6,420  | ✓ | ✓     |       |   |
| <i>Eastern Mediterranean region</i> |     |        |   |       |       |   |
| Bahrain                             | BHR | 12,685 |   | ✓     | ✓     |   |
| Djibouti                            | DJI | 1,158  |   |       |       | ✓ |
| Egypt                               | EGY | 4,184  | ✓ | ✓     | ✓ (F) | ✓ |
| Iran (Islamic Republic of)          | IRN | 5,995  | ✓ | ✓     | ✓     |   |
| Jordan                              | JOR | 3,895  | ✓ | ✓     | ✓     |   |
| Kuwait                              | KWT | 14,278 | ✓ | ✓     | ✓     |   |
| Lebanon                             | LBN | 5,786  |   |       | ✓     | ✓ |
| Morocco                             | MAR | 3,717  |   |       |       | ✓ |
| Pakistan                            | PAK | 2,008  |   |       | ✓     | ✓ |
| Saudi Arabia                        | SAU | 11,764 | ✓ | ✓     | ✓     |   |
| Tunisia                             | TUN | 6,776  | ✓ | ✓     |       | ✓ |
| United Arab Emirates                | ARE | 20,468 | ✓ | ✓ (M) | ✓     |   |
| Yemen                               | YEM | 817    |   |       |       | ✓ |
| <i>European region</i>              |     |        |   |       |       |   |
| Albania                             | ALB | 3,346  |   |       | ✓     | ✓ |
| Andorra                             | AND | 22,573 |   |       |       |   |
| Austria                             | AUT | 23,676 | ✓ | ✓     |       |   |
| Azerbaijan                          | AZE | 2,798  |   |       |       | ✓ |
| Belgium                             | BEL | 23,781 | ✓ | ✓     | ✓     | ✓ |
| Bulgaria                            | BGR | 5,785  |   |       |       | ✓ |
| Croatia                             | HRV | 8,526  |   |       |       | ✓ |
| Czech Republic                      | CZE | 13,666 | ✓ | ✓     | ✓     | ✓ |
| Denmark                             | DNK | 26,608 | ✓ | ✓     | ✓     | ✓ |
| Estonia                             | EST | 9,589  | ✓ | ✓     |       | ✓ |
| Finland                             | FIN | 23,792 | ✓ | ✓     | ✓     | ✓ |
| France                              | FRA | 22,358 | ✓ | ✓     |       | ✓ |
| Georgia                             | GEO | 4,906  | ✓ |       |       | ✓ |
| Germany                             | GER | 22,856 | ✓ | ✓     | ✓     | ✓ |
| Greece                              | GRC | 14,614 |   | ✓     | ✓     | ✓ |
| Hungary                             | HUN | 10,439 | ✓ | ✓     | ✓     | ✓ |
| Iceland                             | ISL | 24,777 | ✓ | ✓     | ✓     | ✓ |
| Ireland                             | IRL | 26,381 | ✓ |       |       |   |
| Israel                              | ISR | 16,954 | ✓ | ✓     |       | ✓ |
| Italy                               | ITA | 21,780 | ✓ | ✓     |       |   |
| Kazakhstan                          | KAZ | 7,391  |   |       |       | ✓ |
| Kyrgyzstan                          | KGZ | 3,015  |   |       |       | ✓ |
| Latvia                              | LVA | 7,653  |   |       | ✓     | ✓ |

|                                |     |        |   |       |       |   |
|--------------------------------|-----|--------|---|-------|-------|---|
| Lithuania                      | LTU | 7,253  | ✓ | ✓ (M) | ✓     | ✓ |
| Malta                          | MLT | 8,353  | ✓ | ✓     | ✓     |   |
| Netherlands                    | NLD | 24,313 | ✓ | ✓     | ✓     |   |
| Norway                         | NOR | 27,060 | ✓ | ✓     |       | ✓ |
| Poland                         | POL | 9,217  | ✓ | ✓     |       | ✓ |
| Portugal                       | PRT | 15,923 |   | ✓     | ✓     | ✓ |
| Romania                        | ROM | 4,285  | ✓ | ✓     | ✓     | ✓ |
| Russian Federation             | RUS | 8,009  | ✓ | ✓     | ✓     | ✓ |
| Slovakia                       | SVK | 11,410 |   |       | ✓     | ✓ |
| Slovenia                       | SVN | 15,745 | ✓ |       |       | ✓ |
| Spain                          | ESP | 18,047 | ✓ | ✓     | ✓     | ✓ |
| Sweden                         | SWE | 23,635 | ✓ | ✓     |       | ✓ |
| Switzerland                    | CHE | 26,414 | ✓ | ✓     | ✓     | ✓ |
| Tajikistan                     | TJK | 1,321  |   |       | ✓     | ✓ |
| Turkey                         | TUR | 6,832  | ✓ | ✓     | ✓     |   |
| Ukraine                        | UKR | 4,622  |   |       |       | ✓ |
| United Kingdom                 | GBR | 22,190 | ✓ | ✓     | ✓     | ✓ |
| Uzbekistan                     | UZB | 2,179  | ✓ |       | ✓     |   |
| Yugoslavia                     | YUG | 5,239  | ✓ |       |       |   |
| <i>South east Asian region</i> |     |        |   |       |       |   |
| Bangladesh                     | BGD | 1,684  |   |       | ✓     | ✓ |
| India                          | IND | 2,479  | ✓ | ✓     | ✓ (F) | ✓ |
| Indonesia                      | IDN | 3,642  | ✓ | ✓     |       | ✓ |
| Nepal                          | NPL | 1,459  |   |       | ✓     | ✓ |
| Sri Lanka                      | LKA | 3,300  | ✓ |       |       | ✓ |
| Thailand                       | THA | 6,857  | ✓ | ✓     | ✓     | ✓ |
| <i>Western Pacific region</i>  |     |        |   |       |       |   |
| Australia                      | AUS | 25,559 | ✓ | ✓     | ✓     |   |
| Cambodia                       | KHM | 1,245  |   |       |       | ✓ |
| China                          | CHN | 3,747  | ✓ | ✓     | ✓     |   |
| Japan                          | JPN | 24,675 | ✓ | ✓     | ✓     |   |
| Kiribati                       | KIR | 1,638  |   | ✓     |       |   |
| Malaysia                       | MYS | 9,919  |   |       | ✓     |   |
| Mongolia                       | MNG | 1,718  | ✓ |       |       |   |
| Nauru                          | NRU | 11,154 | ✓ | ✓     |       |   |
| New Zealand                    | NZL | 1,8816 | ✓ | ✓     |       |   |
| Papua New Guinea               | PNG | 3,092  | ✓ | ✓     |       |   |
| Philippines                    | PHL | 3,425  |   | ✓ (M) | ✓     | ✓ |
| Republic of Korea              | KOR | 15,876 | ✓ |       | ✓ (F) | ✓ |
| Samoa                          | WSM | 2,999  |   |       | ✓     |   |
| Singapore                      | SGP | 23,765 | ✓ | ✓     |       |   |
| Solomon Islands                | SLB | 2,082  |   |       | ✓     |   |
| Viet Nam                       | VNM | 2,241  |   |       | ✓     | ✓ |

<sup>1</sup> Blood pressure and/or cholesterol data for Cameroon, Colombia, Ghana, Mauritius, Senegal, Saint Lucia, Venezuela, Tunisia, Greece, and Haiti were excluded from the analysis because the populations of these countries live primarily in rural areas but the data were from urban populations and/or the study sample sizes were very small.

<sup>2</sup> BMI data for Paraguay, Albania, Romania, and Malta were excluded from the analysis because the populations of these countries live primarily in rural areas but the data were from urban populations and/or the study sample sizes were very small.

<sup>5</sup> Income data (for 2000 and for the analyses in Figures 2 and 3) were from the Penn World Table [Heston, 2002 #318] and from the Global Programme on Evidence for Health Policy, WHO for countries for which Penn World Table did not provide estimates. Because income data for some country-years of interest were not available, the following substitutions were made in Figures 2 and 3: BMI: Cuba 1985 for 1982, Bahrain 1996 for 2000, Kuwait 1996 for 1993, Saudi Arabia 1996 for 1992, Malta 1994 for 1984, Viet Nam 1989 for 1985. Data for Samoa, Solomon islands, United Arab Emirates were from estimates by the Global Programme on Evidence for Health Policy, WHO. Cholesterol: Zimbabwe 2000 for 2001, Cuba 1996 for 2000, Jamaica 2000 for 2001, Bahrain 1996 for 2000, Jordan 2000 for 2001, Saudi Arabia 1996 for 1991, Malta 1994 for 1984, Estonia 1992 for 1991, Republic of Moldova 1995 for 1992, Russian federation 1991 for 1989, Indonesia 2000 for 2001. Data for Kiribati and United Arab Emirates were from estimates by the Global Programme on Evidence for Health Policy, WHO. Blood pressure: Bahamas 1996 for 1988, Haiti 1998 for 2000, Saudi Arabia 1996 for 1995, Malta 1994 for 1989, Slovenia 1990 for 1988, Turkey 200 for 2002, Uzbekistan 1996 for 1997, Mongolia 1996 for 1999. Data for Liberia, United Arab Emirates, Yugoslavia, and Nauru were from estimates by the Global Programme on Evidence for Health Policy, WHO.

<sup>4</sup> Data were available for both females and males unless indicated.

<sup>5</sup> The year of survey was not reported in some studies. In such cases, the year that the study was first published was used. This occurred for one risk factor in Ghana, Mauritius, Senegal, Zimbabwe, Barbados, Brazil, Chile, Jamaica, Belize, Venezuela, Bahrain, Jordan, Greece, Denmark, Georgia, Lithuania, Portugal, and Philippines.
